# Supplementary material for: PDLCs and EPCs Co-Cultured on Ta Discs: A Golden Fleece for “Compromised” Osseointegration
Source: MDPI journal article supplement (doi:10.3390/ijms22094486), 2021-04-26
Supplement: s1 [file s1]

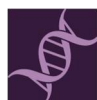

Supplemental Material

# PDLCs and EPCs Co-cultured on Ta Discs: A Golden Fleece for "Compromised" Osseointegration

Hitesh Chopra <sup>1,2</sup>, Yuanyuan Han <sup>3</sup>, Cheng F. Zhang <sup>1</sup>, Edmond H.N. Pow <sup>1,\*</sup>

<sup>1</sup> Division of Restorative Dental Sciences, Faculty of Dentistry, The University of Hong Kong, Hong Kong S.A.R., China; h.chopra@usask.ca (H.C.); zhangcf@hku.hk (C.F.Z.)

<sup>2</sup> College of Dentistry, University of Saskatchewan, Saskatoon, SK S7N 5E4, Canada;

<sup>3</sup> Division of Applied Oral Sciences and Community Dental Care, Faculty of Dentistry, The University of Hong Kong, Hong Kong S.A.R., China; u3006886@connect.hku.hk

\* Correspondence: ehnpow@hku.hk; Tel.: +852-2859-0309

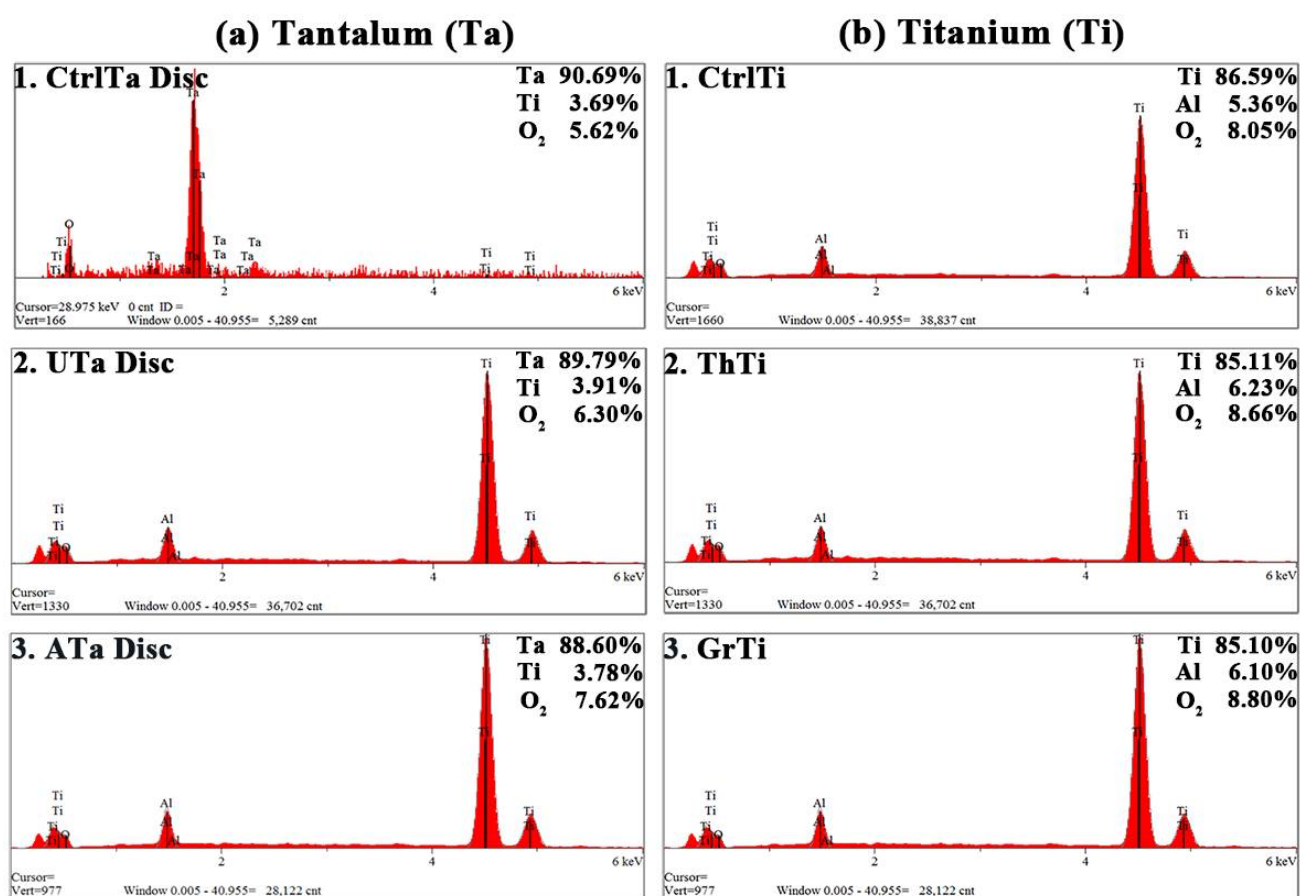

**Figure S1.** Energy-dispersive X-ray spectroscopy (EDX) of various samples. **(a)** Ta discs 1) CtrlTa Disc 2) UTa Disc 3) ATa Disc **(b)** Apical Ti 1) CtrlTi 2) ThTi 3) GrTi.

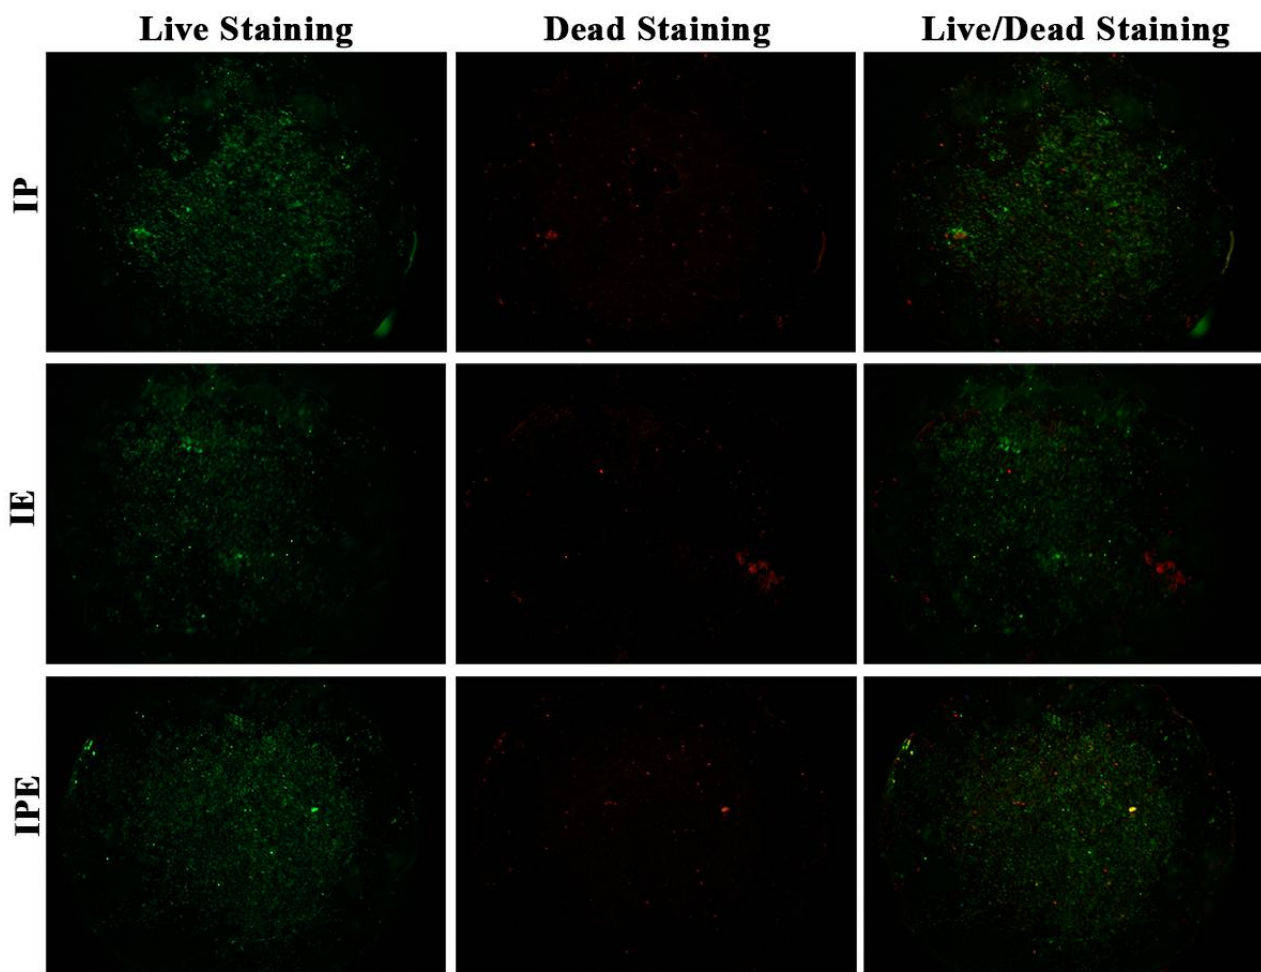

**Figure S2.** Live/dead staining of Cell-Discs in different IP, IE, and IPE groups on day 8.

**Table S1. Optical Interferometer.** One-way repeated measures ANOVA for comparing surface roughness (Sa) in different samples.

| Groups   | Mean $\pm$ Std. Deviation<br>(N=9) | p-value | *Multiple comparisons |
|----------|------------------------------------|---------|-----------------------|
| 1 (PTi)  | .98 $\pm$ .022                     | < 0.05  | 4>6>3>2>1             |
| 2 (ThTi) | 1.33 $\pm$ .065                    |         | 5=4                   |
| 3 (GrTi) | 1.86 $\pm$ .042                    |         | 5=6                   |
| 4 (Ta)   | 2.11 $\pm$ .007                    |         |                       |
| 5 (UTa)  | 2.06 $\pm$ .021                    |         |                       |
| 6 (Ata)  | 1.98 $\pm$ .015                    |         |                       |

Post-Hoc Tukey HSD test for multiple comparisons with adjustment (statistically significant at  $p < 0.05$ ).

**Table S2.** Growth Curve of PDLCs and EPCs either cultured alone (IP/IE) or both (IPE) on Ta discs.

| x     | Groups <sup>a</sup> | Mean $\pm$ Standard deviation (N=3) | Pairwise comparison |                           |         |         |
|-------|---------------------|-------------------------------------|---------------------|---------------------------|---------|---------|
|       |                     |                                     | Between groups      | Within group <sup>b</sup> |         |         |
|       |                     |                                     | p value             | rIP                       | rIE     | rIPE    |
| Day2  | 1                   | 0.047 $\pm$ 0.022                   | 2>3=1               | Day 2 <                   | Day 2 < | Day 2 < |
|       | 2                   | 0.327 $\pm$ 0.044                   | ( <i>p</i> < 0.05)  | Day 6 <                   | Day 6 < | Day 6 < |
|       | 3                   | 0.116 $\pm$ 0.063                   |                     | Day 10                    | Day 10  | Day 10  |
| Day6  | 1                   | 0.572 $\pm$ 0.078                   | 2>3>1               |                           |         |         |
|       | 2                   | 1.628 $\pm$ 0.065                   | ( <i>p</i> < 0.05)  |                           |         |         |
|       | 3                   | 0.891 $\pm$ 0.095                   |                     |                           |         |         |
| Day10 | 1                   | 1.185 $\pm$ 0.075                   | 2>3>1               |                           |         |         |
|       | 2                   | 2.273 $\pm$ 0.053                   | ( <i>p</i> < 0.05)  |                           |         |         |
|       | 3                   | 1.841 $\pm$ 0.126                   |                     |                           |         |         |

a. Group 1: rIP; Group 2: rIE; Group 3: rIPE; b. Post-Hoc Tukey HSD test for multiple comparisons with adjustment (statistically significant at *p* < 0.05).

**Table S3.** Primer sequences for RT-qPCR of osteogenic and angiogenic genes.

| Genes   | Accession number | Primer | Primer Sequence (5'-3') | Amplicon length (bp) | T m (°C) |
|---------|------------------|--------|-------------------------|----------------------|----------|
| GAPDH   | NM_001082253.1   | F      | TGGTGAAGGTCGGAGTGAAC    | 121                  | 62       |
|         |                  | R      | ATGTAGTGGAGGTCAATGAATGG |                      |          |
| ALP     | XM_017346489.1   | F      | AGAAACCCCTTCACTGCCATC   | 128                  | 60       |
|         |                  | R      | GGTAGTTGTTGTGAGCGTAGTC  |                      |          |
| RUNX-2  | XM_008262992.2   | F      | CGCATTCCTCATCCCAGTAT    | 118                  | 60       |
|         |                  | R      | GCCTGGGGTCTGTAATCTGA    |                      |          |
| BSP     | XM_008267617.2   | F      | CTACCGTTCCGGAGTGATTT    | 95                   | 62       |
|         |                  | R      | TCAGTGGCCCTCATTTACAG    |                      |          |
| VEGFR-2 | NM_001195670.1   | F      | GAAGAGGAAGTGTGCGACCC    | 167                  | 60       |
|         |                  | R      | TCCGACTGGTTGTCATCTGG    |                      |          |
| CD31    | XM_008271716.2   | F      | CAAGGAGAACGGGGACAGAC    | 225                  | 60       |
|         |                  | R      | ATCACCCCGATGACAACCAC    |                      |          |
